# Supplementary material for: India’s Engagement in Development and Peacebuilding Assistance in the Post-Conflict States: An Assessment
Source: Frontiers journal article supplement (doi:10.3389/fpos.2021.637912), 2021-05-31
Supplement: Data_Sheet_1.docx [file Data_Sheet_1.docx]

*Table I: Grants and interest rate subsidies to Development Partners and International Contribution from 2015 to 2019*

| **Entities** | **2015-2016 (Crores** | **2016-2017 (Crores**) | **2018-2019 (Crores)** |
| --- | --- | --- | --- |
| Afghanistan | 880.44 | 263.02 | 469.98 |
| Bangladesh | 155.68 | 82.59 | 131.81 |
| Bhutan | 2127.66 | 2159.91 | 1985.88 |
| Nepal | 309.94 | 332.72 | 763.39 |
| Sri Lanka | 403.80 | 99.16 | 168.78 |
| Maldives | 55.04 | 80.00 | 439.40 |
| Mongolia | 7.49 | 1.94 | 0.62 |
| Other Developing Countries | 103.50 | 113.77 | 124.99 |
| Disaster Relief | 117.22 | 23.30 | 19.12 |
| African Countries | 283.83 | 286.39 | 339.98 |
| Eurasian Countries | 19.37 | 10.73 | 29.52 |
| Latin American Countries | 15.03 | 8.77 | 10.02 |
| Myanmar | 117.07 | 123.62 | 376.22 |
| Support to International  Training/Programmes | 328.19 | 354.38 | 343.56 |
| Chabahar Port | … | 100.00 | … |
| Mauritius | … | 409.97 | 659.81 |
| Seychelles | … | 49.98 | 99.80 |
| Exim Bank | 514.36 | 571.99 | 628.97 |
| Indian Companies | … | … | 17.23 |
| Technical and Economic Cooperation with other countries | 1.33 | 1.86 | 47.97 |
| Technical and Economic  Corporation with Other Countries (International  Contribution) | 49.29 | 50.91 | 57.79 |
| **Grand Total** | **5,489.24** | **5,125.01** | **6714.84** |

Sources: Indian Budget (2017-2018), “Expenditure Profile 2017-2018”, pp. 163, <https://www.indiabudget.gov.in/budget2017-2018/ub2017-18/eb/vol1.pdf> ; Indian Budget (2018-2019), “Expenditure Profile 2018-2019”, p. 174, <https://www.indiabudget.gov.in/budget2018-2019/ub2018-19/eb/vol1.pdf>, Indian Budget (2020-2021), “Expenditure Profile 2020-2021”, pp. 200-201, <https://www.indiabudget.gov.in/doc/eb/vol1.pdf>; Indian Budget (2019-2020) [Accessed on October 02, 2020].

---------------------

*Table II:**Comparison Development Assistance between DAC countries and India*

| **Indicators** | **Aid programme of Developed Countries** | **Development partnership of India** |
| --- | --- | --- |
| **Nature and purpose of support**  **Participants**  **Level of development**  **Relationship between participants**  **Conditionality**  **Flexibility**  **Priority sectors**  **Main Focus**  **Data, monitoring and evaluation**  **Role of NGOs**  **Role of Private Sector** | Assistance stated to be altruistic in nature  At least one participant has very high per capita income  Large differences in stages of economic development between donors and recipients  Donors and recipient relationship  “Top-down” with policy conditionality  Multilayered time-consuming bureaucratic structures, hence added transaction cost  Grant assistance and budget support for social sectors  Governance gap  Peer-reviewed by DAC-OECD. Data are compiled and periodically released by the national governments and DAC-OECD  Extensive  Limited | Mutual benefits and solidarity in nature  Both partners may have very low per-capita income  Both partners almost at the same stage of economic development  Relationship of equality, both may contribute to the process  Demand-driven and free from conditionality  Highly decentralized and relatively fast with a few implications for transaction cost  Economic and technical cooperation largely confined to projects in infrastructure, productive sector and  capacity building  Capacity gap  No monitoring mechanisms beyond occasional reports of  data and anecdotal details  Limited  Extensive |

Source: Modified version of Table in Chaturvedi, Sachin. 2014. “Features of South-South Cooperation and Global Dynamics”, in *Forum of India Development Cooperation (FICD) Policy Brief No 1.Research and Information System for Developing Countries (RIS),* <http://fidc.ris.org.in/sites/default/files/1.pdf> [Accessed on October 28, 2020].

-----------------

*Table III: ITEC Training Programme for Afghanistan (2006-2019)*

| Academic Year | No. of ITEC Trainee Attended the Course |
| --- | --- |
| 2006-07 | 498 |
| 2007-08 | 428 |
| 2008-09 | 375 |
| 2009-10 | 449 |
| 2010-11 | 372 |
| 2011-12 | 455 |
| 2012-13 | 448 |
| 2013-14 | 411 |
| 2014-15 | 386 |
| 2015-16 | 318 |
| 2016-17 | 530 |
| 2017018 | 604 |
| 2018-19 | 328 |

Source: Embassy of India, Kabul (n.), “ITEC Fellowship”, <https://eoi.gov.in/kabul/?0360?000> [Accessed on October 29, 2020].

---------------

*Table IV: ITEC Training Programme for Democratic Republic of Congo (2007-2016 to 2019-20)*

| Academic Year | No. of ITEC slots Trainee Attended the Course /Allocated |
| --- | --- |
| 2007-2016 | 515 |
| 2016-17 | 105 |
| 2017-18 | 99 |
| 2018-19 | 78 |
| 2019-20 | 22 |

Source: Ministry of External Affairs (Government of Indian) (n.), “Brief on India-Democratic Republic of Congo (DRC) Relations”, <https://mea.gov.in/Portal/ForeignRelation/Dilateral_brief-Democratic_Republic_of_Congo_sep_2019.pdf> [Accessed October 29, 2020].

---------------------

*Table V: Lines of Credit to the Democratic Republic of Congo*

| Year | Amount | Purpose |
| --- | --- | --- |
| 2005-06 | US$ 33.5 million | for setting up a cement plant and acquisition of buses for the urban transport sector |
| 2010 | US$ 42 million | For Kakobola 9.3 MW Hydropower Project, Bandundu Province |
| 2011 | US$ 168 million | for the Katende Hydropower Project (64 MW), in the Kasai Occidental Province |
| 2015 | US$ 34.50 million | for the Development of Transmission and Distribution Line Project for evacuation of power from Kakobola Hydropower Project |
| 2015 | US$ 109.942 million | for Transmission and Distribution Line Project for the evacuation of power from the Katende Hydropower Project |
| 2019 | US$ 33.29 million | for installation of 15 MW Solar Photovoltaic Power Project at Karawa, Province North Ubangi |
| 2019 | US$ 25.27 million | for installation of 10 MW Solar Photovoltaic Power Project at Lusambo, Province Sankuru |
| 2019 | US$ 24.55 million | for installation of 10 MW Solar Photovoltaic Power Project at Mbandaka, Province Equator |
| 2019 | US$ 56.82 million | for Installation of 15 MW Solar Photovoltaic Power Project at Tshilenge  (Mbuji-Mayi) |
| 2019 | US$ 26.64 million | for Installation of 10 MW Solar Photovoltaic Power Project at Manono |
| 2019 | US$ 56.82 million | for Installation of 15 MW Solar Photovoltaic Power Project at Gemena |

Source: Ministry of External Affairs (Government of Indian) (n.), “Brief on India-Democratic Republic of Congo (DRC) Relations”, <https://mea.gov.in/Portal/ForeignRelation/Dilateral_brief-Democratic_Republic_of_Congo_sep_2019.pdf> [Accessed October 14, 2020]. Ministry of External Affairs, Annual Report 2019-20, p. 241, weblink <http://www.mea.gov.in/Uploads/PublicationDocs/32489_AR_Spread_2020_new.pdf> [Accessed October 25, 2020].

------------------------

*Chart I: Grants and Loans to countries and regions in 2020-2021(per cent of the total grants and loans)*

Source: Ministry of External Affairs (n), <https://meadashboard.gov.in/indicators/92> [Accessed October 10, 2020].

---------------------

*Chart II: Grant to Afghanistan and African Region with Many post-Conflict States (2008-09 to 2020-21) (per cent of the total grants and loans)*

Source: Ministry of External Affairs (n), <https://meadashboard.gov.in/indicators/92> [Accessed October 12, 2020].

-------------
